# Supplementary material
Source: PubMed Central journal article supplement (PMC4635037)
Supplement: NIHMS727595-supplement-2.pdf [file NIHMS727595-supplement-2.pdf]

## **Supplemental Information Inventory:**

**Supplemental Data** contains Figures S1-S4 and Table S1.

### **List of Supplemental Data Files:**

**File S1**, related to **Figure 1**. Validation report for the A1 structure.

**File S2**, related to **Figure 1**. Validation report for the C3 structure.

**File S3**, related to **Figure 6**. Alignment used for isoform conservation ratio (ICR) analysis.

**File S4**, related to **Figure 6**. Spreadsheet containing the ICR data.

**File S5**, related to **Figure 7**. Alignment used for EVCouplings.

**File S6**, related to **Figure 7**. Coupling scores from EVcouplings

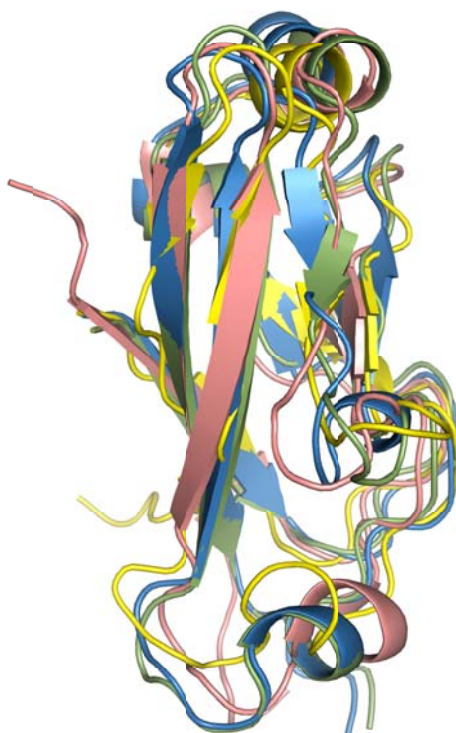

**Figure S1**, related to **Figure 1**. Superpositions indicate similar structures of clustered Pcdh EC1. Alignment of Pcdh $\gamma$ A1 (blue), Pcdh $\gamma$ C3 (green), Pcdh $\alpha$ 4 (pink; 1wuz), and Pcdh $\beta$ 14 (yellow; 1wyj). Pairwise backbone root-mean-square deviations (rmsds) range from 1.05 to 2.01 Å, indicating structural conservation among all subfamilies ( $\alpha$ -,  $\beta$ -,  $\gamma$ -, and C-type) of clustered Pcdhs.

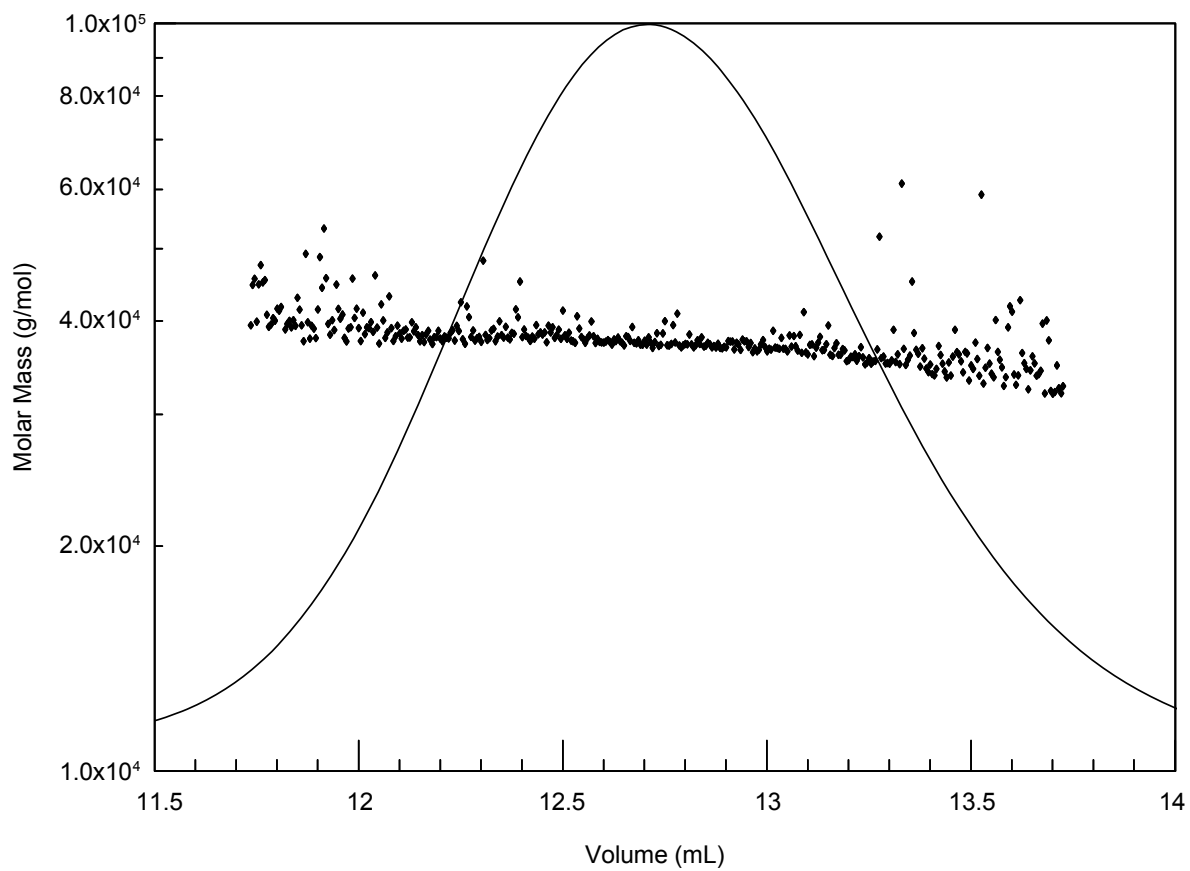

**Figure S2**, related to **Figure 2**. Multi-angle laser light scattering shows that A1 is a monomer in solution. The major peak at 12.86 mL corresponded to a molar mass of 37.7 kDa, compared to the predicted molar mass of 36.7 kDa.

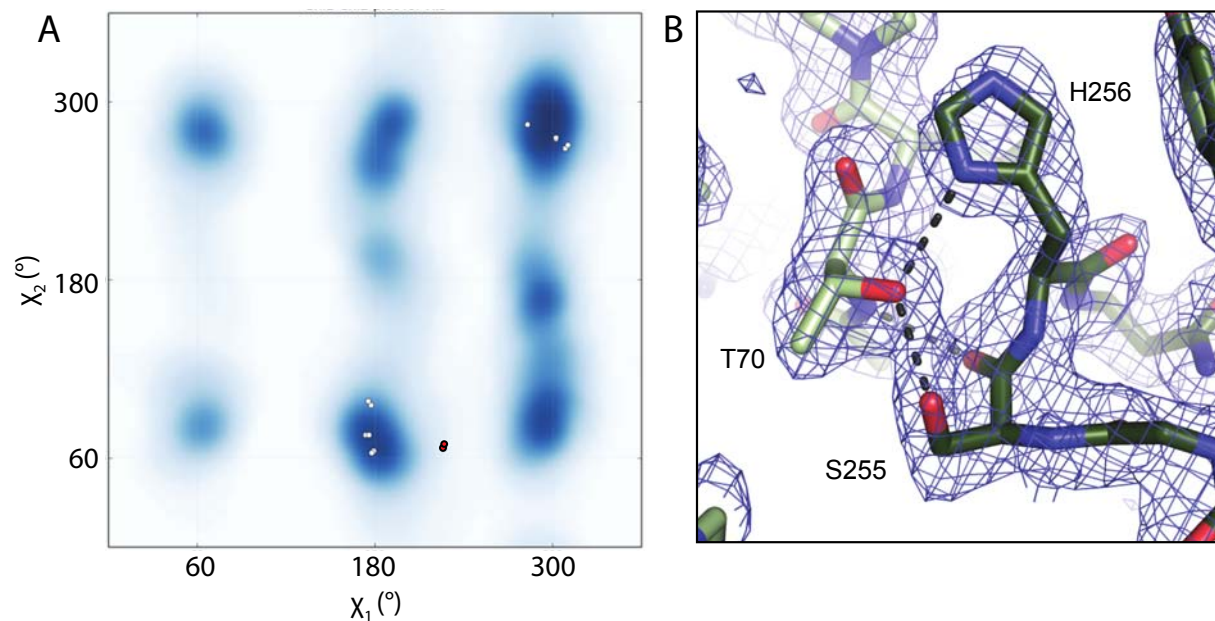

**Figure S3**, related to **Figure 3**. Histidine  $\chi$  angle distributions for residues in C3 structure. (A) H256 from both subunits in the asymmetric unit (red symbols) are rotamer outliers with  $\chi_1$  of  $\sim 230^\circ$  and  $\chi_2$  of  $\sim 60^\circ$ . Blue shading corresponds to distribution of  $\chi$  angles for histidine residues in the PDB, as generated by PHENIX (1). (B) Electron density at (final  $2F_o - F_c$  map at  $1\sigma$ ) of a hydrogen-bond network involving T70 from one protomer with S255 and H256 of another protomer from the C3 structure. Hydrogen bonds hold H256 in a stable rotamer outlier position.

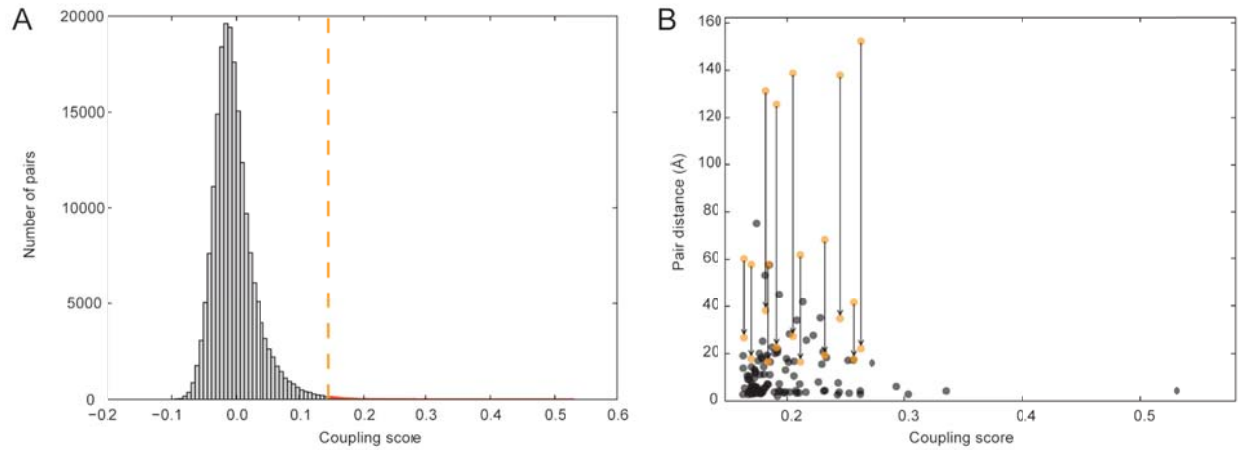

**Figure S4**, related to **Figure 7**. Top evolutionary correlations support antiparallel complex formation. (A) Histogram of correlated pair coupling scores from EVCouplings analysis. The vertical orange line indicates the significant coupling score cutoff of 1.6 times the background-normalized coupling scores. (B) The top 320 (alignment length/2) coupling scores plotted against the pair distance in the C3 monomer structure (black). Orange pairs are the 11 cross-EC pairs whose pair distance is minimized (shown by the dropped down arrows) in the A1 and C3 complexes. The minimized pair distance for the cross-EC pairs is the minimum of the pair distance when considering both the A1 and C3 complex structures.

**Table S1**, related to **Figure 4**. Cadherin structures used in analysis illustrated in **Figure 4**

| <b>PDB ID</b>     | <b>Protein</b> | <b>Gene name</b> | <b>Species</b>                 | <b>#ECs</b> | <b>Group</b>       | <b>Notes</b>                              |
|-------------------|----------------|------------------|--------------------------------|-------------|--------------------|-------------------------------------------|
| <b>1l3w</b>       | C-cadherin     | CDH3             | <i>Xenopus laevis</i>          | 5           | Classical          | only used EC1-3                           |
| <b>2qvf</b>       | E-cadherin     | CDH1             | <i>Mus musculus</i>            | 2           | Classical          |                                           |
| <b>3q2v_a</b>     | E-cadherin     | CDH1             | <i>Mus musculus</i>            | 5           | Classical          | only used EC1-3                           |
| <b>1edh</b>       | E-cadherin     | CDH1             | <i>Mus musculus</i>            | 2           | Classical          |                                           |
| <b>2qvl</b>       | N-cadherin     | CDH2             | <i>Mus musculus</i>            | 2           | Classical          |                                           |
| <b>3q2w</b>       | N-cadherin     | CDH2             | <i>Mus musculus</i>            | 5           | Classical          | only used EC1-3                           |
| <b>3ubh</b>       | N-cadherin     | CadN CG7100      | <i>Drosophila melanogaster</i> | 4           | Classical          | only used EC1-2                           |
| <b>1ncj</b>       | N-cadherin     | CDH2             | <i>Mus musculus</i>            | 2           | Classical          |                                           |
| <b>3ppe_a</b>     | VE-cadherin    | CDH5             | <i>Gallus gallus</i>           | 2           | Classical          |                                           |
| <b>3lnd_a</b>     | Cadherin-6     | CDH6             | <i>Mus musculus</i>            | 2           | Classical          | W4A                                       |
| <b>2a62</b>       | Cadherin-8     | CDH8             | <i>Mus musculus</i>            | 3           | Classical          |                                           |
| <b>2a4e</b>       | Cadherin-11    | CDH11            | <i>Mus musculus</i>            | 2           | Classical          |                                           |
| <b>3k5s_a</b>     | T-cadherin     | CDH13            | <i>Gallus gallus</i>           | 2           | Classical          |                                           |
| <b>3mvs</b>       | Cadherin-23    | CDH23            | <i>Mus musculus</i>            | 2           | Pcdh/non-classical |                                           |
| <b>2wcp</b>       | Cadherin-23    | CDH23            | <i>Mus musculus</i>            | 2           | Pcdh/non-classical |                                           |
| <b>2whv</b>       | Cadherin-23    | CDH23            | <i>Mus musculus</i>            | 2           | Pcdh/non-classical | all Ca <sup>2+</sup> -binding sites bound |
| <b>4apx_a</b>     | Cadherin-23    | CDH23            | <i>Mus musculus</i>            | 2           | Pcdh/non-classical |                                           |
| <b>4apx_b</b>     | Pcdh-15        | PCDH15           | <i>Mus musculus</i>            | 2           | Pcdh/non-classical |                                           |
| <b>4aq8_a</b>     | Cadherin-23    | CDH23            | <i>Mus musculus</i>            | 2           | Pcdh/non-classical | form II                                   |
| <b>4aq8_c</b>     | Pcdh-15        | PCDH15           | <i>Mus musculus</i>            | 2           | Pcdh/non-classical | form II                                   |
| <b>Pcdh15EC35</b> | Pcdh-15        | PCDH15           | <i>Homo sapiens</i>            | 3           | Pcdh/non-classical | unpublished; only used EC3-4              |
| <b>PcdhgC3</b>    | PcdhgC3        | PcdhgC3          | <i>Mus musculus</i>            | 3           | clustered Pcdh     |                                           |
| <b>PcdhgA1</b>    | PcdhgA1        | PcdhgA1          | <i>Mus musculus</i>            | 3           | clustered Pcdh     |                                           |
